# Supplementary material
Source: PubMed Central journal article supplement (PMC5583489)
Supplement: AEM.01168-17_zam018178040s1.pdf [file AEM.01168-17_zam018178040s1.pdf]

Supplemental Table 1. List of homologs (>50% identity) and unique genes in VPI $\alpha$ , VP $\alpha$ I $\beta$  and VP $\alpha$ I $\gamma$ .

A: VP $\alpha$ I $\alpha$  (VP $\alpha$ I-7) gene content and corresponding homologs in VP $\alpha$ I $\beta$  and VP $\alpha$ I $\gamma$

| <b>RIMD2210633 VPI<math>\alpha</math> (VP<math>\alpha</math>I-7) NCBI annotated</b> | <b>MAVP-Q<br/>VP<math>\alpha</math>I<math>\gamma</math></b> | <b>TH3996<br/>VP<math>\alpha</math>I<math>\beta</math></b> | <b>MAVP-R<br/>VP<math>\alpha</math>I<math>\beta</math></b> |
|-------------------------------------------------------------------------------------|-------------------------------------------------------------|------------------------------------------------------------|------------------------------------------------------------|
| VPA1310_- _hypothetical_protein                                                     |                                                             |                                                            |                                                            |
| VPA1311_- _hypothetical_protein                                                     |                                                             |                                                            |                                                            |
| VPA1312_- _hypothetical_protein                                                     | QPI_00008                                                   | PI_00006                                                   | RPI_00014                                                  |
| VPA1313_- _hypothetical_protein                                                     |                                                             |                                                            |                                                            |
| VPA1314_- _thermostable_direct_hemolysin_A ( <i>tdh2</i> )                          | <i>tdh3</i> :QPI_00012                                      |                                                            |                                                            |
| VPA1315_- _hypothetical_protein                                                     |                                                             |                                                            |                                                            |
| VPA1316_- _transposase                                                              | QPI_00086                                                   |                                                            |                                                            |
| VPA1317_- _hypothetical_protein                                                     |                                                             |                                                            |                                                            |
| VPA1318_- _hypothetical_protein                                                     | QPI_00088                                                   | PI_00083                                                   |                                                            |
| VPA1320_- _hypothetical_protein                                                     | QPI_00089                                                   |                                                            |                                                            |
| VPA1319_- _IS1655_transposase                                                       |                                                             |                                                            |                                                            |
| VPA1321_- _cytotoxic_necrotizing_factor ( <i>vopC</i> <sup>1</sup> )                |                                                             |                                                            |                                                            |
| VPA1322_- _zinc_finger_protein                                                      | QPI_00079                                                   | PI_00076                                                   | RPI_00086                                                  |
| VPA1323_- _hypothetical_protein                                                     |                                                             |                                                            |                                                            |
| VPA1324_- _hypothetical_protein                                                     | QPI_00080                                                   | PI_00077                                                   | RPI_00087                                                  |
| VPA1325_- _hypothetical_protein                                                     |                                                             |                                                            |                                                            |
| VPA1326_- _hypothetical_protein                                                     |                                                             |                                                            |                                                            |
| VPA1327_- _exoenzyme_T ( <i>vopT</i> <sup>1</sup> )                                 |                                                             |                                                            |                                                            |
| VPA1328_- _hypothetical_protein                                                     |                                                             |                                                            |                                                            |
| VPA1329_- _TraA_protein                                                             |                                                             |                                                            |                                                            |
| VPA1330_- _hypothetical_protein                                                     |                                                             |                                                            |                                                            |
| VPA1331_- _ospC2                                                                    |                                                             |                                                            |                                                            |
| VPA1332_- _transcriptional_regulator_( <i>vtrA</i> )                                |                                                             |                                                            |                                                            |
| VPA1333_- _hypothetical_protein                                                     | QPI_00042                                                   | PI_00037                                                   | RPI_00048                                                  |
| VPA1334_- _hypothetical_protein <sup>2</sup>                                        |                                                             |                                                            |                                                            |
| VPA1335_- _type_III_secretion_apparatus_protein <sup>2</sup> ( <i>vscS2</i> )       | QPI_00043                                                   | PI_00038                                                   | RPI_00049                                                  |
| VPA1336_- _hypothetical_protein ( <i>vopZ</i> <sup>1</sup> )                        |                                                             |                                                            |                                                            |
| VPA1337_- _hypothetical_protein                                                     | QPI_00045                                                   | PI_00040                                                   | RPI_00051                                                  |
| VPA1338_- _ATPase_YscN ( <i>vscN2</i> <sup>2</sup> )                                | QPI_00046                                                   | PI_00041                                                   | RPI_00052                                                  |
| VPA1339_- _type_III_secretion_system_EscC_protein ( <i>vscC2</i> <sup>2</sup> )     | QPI_00047                                                   | PI_00042                                                   | RPI_00053                                                  |
| VPA1340_- _hypothetical_protein                                                     |                                                             |                                                            |                                                            |
| VPA1341_- _Spa29_component_of_the_Mxi-Spa_secretion_machinery ( <i>vscT2</i> )      | QPI_00049                                                   | PI_00044                                                   | RPI_00055                                                  |
| VPA1342_- _type_III_secretion_system_protein ( <i>vscR2</i> <sup>2</sup> )          | QPI_00050                                                   | PI_00045                                                   | RPI_00056                                                  |
| VPA1343_- _hypothetical_protein                                                     | QPI_00051                                                   | PI_00046                                                   | RPI_00057                                                  |
| VPA1344_- _hypothetical_protein                                                     |                                                             |                                                            |                                                            |
| VPA1345_- _hypothetical_protein ( <i>vopW</i> <sup>2</sup> )                        |                                                             |                                                            |                                                            |
| VPA1346_- _targeted_effector_protein_YopP ( <i>vopA/P</i> <sup>1</sup> )            | QPI_00075                                                   | PI_00072                                                   | RPI_00082                                                  |
| VPA1347_- _hypothetical_protein                                                     |                                                             |                                                            |                                                            |
| VPA1348_- _transcriptional_activator ( <i>vtrB</i> )                                | QPI_00052                                                   | PI_00048                                                   | RPI_00058                                                  |
| VPA1349_- _Type_III_secretion_protein_Spa33 ( <i>vscQ2</i> <sup>2</sup> )           | QPI_00053                                                   | PI_00049                                                   | RPI_00059                                                  |
| VPA1350_- _hypothetical_protein T3SS <sup>3</sup>                                   | QPI_00054                                                   | PI_00050                                                   | RPI_00060                                                  |
| VPA1351_- _hypothetical_protein                                                     |                                                             |                                                            |                                                            |

|                                                                                             |                        |          |           |
|---------------------------------------------------------------------------------------------|------------------------|----------|-----------|
| VPA1352_- _hypothetical_protein                                                             |                        |          |           |
| VPA1353_- _outer_membrane_protein ( <i>ompA</i> ) <sup>3</sup>                              | QPI_00057              | PI_00053 | RPI_00063 |
| VPA1354_- _type_III_secretion_system_EscU_protein ( <i>vscU2</i> ) <sup>2</sup>             | QPI_00058              | PI_00054 | RPI_00064 |
| VPA1355_- _type_III_secretion_system_EscV_protein ( <i>vcrD2</i> ) <sup>2</sup>             | QPI_00059              | PI_00055 | RPI_00065 |
| VPA1356_- _hypothetical_protein <sup>3</sup>                                                | QPI_00060              | PI_00056 | RPI_00066 |
| VPA1357_- _hypothetical_protein ( <i>vopV</i> ) <sup>1</sup>                                |                        |          |           |
| VPA1358_- _dimethyladenosine_transferase                                                    |                        |          |           |
| VPA1359_- _hypothetical_protein                                                             | QPI_00064              | PI_00060 | RPI_00070 |
| VPA1360_- _hypothetical_protein <sup>3</sup>                                                | QPI_00065              | PI_00061 | RPI_00071 |
| VPA1361_- _hypothetical_protein ( <i>vopD2</i> ) <sup>2</sup>                               | QPI_00066              | PI_00062 | RPI_00072 |
| VPA1362_- _secreted_protein_EspD ( <i>vopB2</i> ) <sup>2</sup>                              | QPI_00067              | PI_00063 | RPI_00073 |
| VPA1363_- _chaperone <sup>3</sup>                                                           | QPI_00068              | PI_00064 | RPI_00074 |
| VPA1364_- _hypothetical_protein <sup>3</sup>                                                |                        |          |           |
| VPA1365_- _two-component_response_regulator                                                 | QPI_00069              | PI_00066 | RPI_00076 |
| VPA1366_- _hypothetical_protein <sup>3</sup>                                                |                        |          |           |
| VPA1367_- _type_III_secretion_system_lipoprotein_ <i>eprK</i> ( <i>vscJ2</i> ) <sup>2</sup> | QPI_00071              | PI_00068 | RPI_00078 |
| VPA1368_- _hypothetical_protein                                                             | QPI_00072              | PI_00069 | RPI_00079 |
| VPA1369_- _hypothetical_protein                                                             |                        |          |           |
| VPA1371_- _hypothetical_protein                                                             |                        |          |           |
| VPA1370_- _hypothetical_protein ( <i>vopL</i> ) <sup>1</sup>                                |                        |          |           |
| VPA1372_- _hypothetical_protein                                                             |                        |          |           |
| VPA1373_- _hypothetical_protein                                                             |                        |          |           |
| VPA1374_- _transposase,_partial                                                             |                        |          |           |
| VPA1375_- _hypothetical_protein                                                             |                        |          |           |
| VPA1376_- _hypothetical_protein                                                             |                        |          |           |
| VPA1377_- _hypothetical_protein                                                             |                        |          |           |
| VPA1378_- _thermostable_direct_hemolysin_S ( <i>tdh1</i> )                                  |                        |          |           |
| VPA1379_- _transposase                                                                      |                        |          |           |
| VPA1380_- _OspB_protein                                                                     |                        |          |           |
| VPA1381_- _hypothetical_protein                                                             |                        |          |           |
| VPA1382_- _integral_membrane_protein                                                        |                        |          |           |
| VPA1383_- _hypothetical_protein                                                             |                        |          |           |
| VPA1384_- _hypothetical_protein                                                             |                        |          |           |
| VPA1385_- _integral_membrane_protein                                                        |                        |          |           |
| VPA1386_- _hypothetical_protein                                                             |                        |          |           |
| VPA1387_- _hypothetical_protein                                                             | QPI_00095              | PI_00085 |           |
| VPA1388_- _hypothetical_protein                                                             | <i>csy2</i> :QPI_00096 | PI_00087 |           |
| VPA1389_- _hypothetical_protein                                                             | <i>csy3</i> :QPI_00097 | PI_00088 |           |
| VPA1390_- _hypothetical_protein                                                             | <i>csy4</i> :QPI_00098 | PI_00089 |           |
| VPA1391_- _hypothetical_protein                                                             | QPI_00099              | PI_00090 |           |
| VPA1392_- _hypothetical_protein                                                             | <i>vspR</i> :QPI_00100 | PI_00091 |           |
| VPA1393_- _hypothetical_protein                                                             | QPI_00101              | PI_00092 |           |
| VPA1394_- _transposition_protein                                                            |                        |          |           |
| VPA1395_- _transposase                                                                      |                        |          |           |
| VPA1396_- _hypothetical_protein                                                             |                        |          |           |

<sup>1</sup>Denotes an identified T3SS2 effector, <sup>2</sup>denotes T3SS2 apparatus gene, and <sup>3</sup>denotes gene required for T3SS structure formation (2, 4)

B: Genes in VPaI $\beta$  with corresponding homologs in VPaI $\gamma$ , absent or divergent in VPaI $\alpha$

| TH3996 PI VPaI $\beta$ | Annotation                                                        | MAVP-Q VPaI $\gamma$     | MAVP-RPI VPaI $\beta$ |
|------------------------|-------------------------------------------------------------------|--------------------------|-----------------------|
| PI_00001               | Manganese ABC transporter substrate-binding lipoprotein precursor |                          |                       |
| PI_00002               | hypothetical protein                                              |                          |                       |
| PI_00003               | ChrR Cupin-like domain protein                                    |                          |                       |
| PI_00004               | Hemolysin secretion protein D                                     | <i>hlyD_1</i> :QPI_00003 | PI_00008              |
| PI_00005               | hypothetical protein                                              |                          |                       |
|                        | Transposase DDE domain protein                                    | QPI_00005                | RPI_00017             |
|                        | Integrase core domain protein                                     | QPI_00007                | RPI_00013             |
|                        | hypothetical protein                                              | QPI_00008                | RPI_00014             |
|                        | hypothetical protein                                              | QPI_00009                | RPI_00015             |
|                        | Hypothetical protein                                              | QPI_00010                | RPI_00016             |
| PI_00007               | Bicyclomycin resistance protein                                   |                          |                       |
| PI_00008               | Transposase                                                       | QPI_00013                | PI_00020              |
| PI_00009               | hypothetical protein                                              |                          |                       |
| PI_00010               | <i>ureG</i>                                                       | QPI_00016                | RPI_00024             |
| PI_00011               | <i>ureF</i>                                                       | QPI_00017                | RPI_00025             |
| PI_00012               | <i>ureE</i>                                                       | QPI_00018                | RPI_00026             |
| PI_00013               | <i>ureC</i>                                                       | QPI_00019                | RPI_00027             |
| PI_00014               | <i>ureB</i>                                                       | QPI_00020                | RPI_00028             |
| PI_00015               | <i>ureA</i>                                                       | QPI_00021                | RPI_00029             |
| PI_00016               | <i>ureD</i>                                                       | QPI_00022                | RPI_00030             |
| PI_00017               | <i>appA</i>                                                       | QPI_00023                | RPI_00031             |
| PI_00018               | <i>oppB</i>                                                       | QPI_00024                | RPI_00032             |
| PI_00019               | <i>ddpC</i>                                                       | QPI_00025                | RPI_00026             |
| PI_00020               | <i>oppD</i>                                                       | QPI_00026                | RPI_00033             |
| PI_00021               | <i>ddpF</i>                                                       | QPI_00027                | RPI_00034             |
| PI_00022               | <i>ureR</i>                                                       | QPI_00029                | RPI_00035             |
| PI_00023               | hypothetical protein                                              |                          |                       |
| PI_00024               | <i>trh</i>                                                        | QPI_00030                | RPI_00037             |
| PI_00025               | hypothetical protein                                              |                          |                       |
| PI_00026               | transposase                                                       | QPI_00031                | RPI_00038             |
| PI_00027               | putative <i>ospB</i>                                              | QPI_00032                | RPI_00040             |
| PI_00028               | H-NS like protein                                                 | <i>stpA</i> :QPI_00033   | RPI_00041             |
| PI_00029               | accessory colonization factor <i>acfD</i>                         | QPI_00034                | RPI_00042             |
| PI_00030               | hypothetic protein                                                | QPI_00035                | RPI_00043             |
| PI_00031               | hypothetic protein                                                |                          |                       |
| PI_00032               | hypothetic protein                                                | QPI_00036                | RPI_00044             |
| PI_00033               | <i>yedA</i>                                                       | QPI_00037                | RPI_00045             |
| PI_00034               | hypothetic protein                                                | QPI_00039                | RPI_00075             |
| PI_00035               | putative transcriptional regulator ( <i>vtrA</i> )                | QPI_00040                | RPI_00046             |
| PI_00036               | hypothetic protein                                                | QPI_00041                | RPI_00047             |
| PI_00039               | hypothetical protein ( <i>vopZ</i> location)                      | QPI_00044                | RPI_00050             |
| PI_00043               | hypothetical protein                                              | QPI_00048                | RPI_00054             |
| PI_00047               | hypothetical protein                                              |                          |                       |
| PI_00051               | hypothetical protein                                              | QPI_00055                | RPI_00061             |
| PI_00052               | hypothetical protein                                              | QPI_00056                | RPI_00062             |
|                        | repetitive sequence ( <i>vopV</i> location)                       | QPI_00061                | RPI_00067             |
| PI_00057               | hypothetical protein                                              |                          |                       |

|          |                                                    |                         |           |
|----------|----------------------------------------------------|-------------------------|-----------|
| PI_00058 | hypothetical protein                               | QPI_00062               | RPI_00068 |
| PI_00059 | hypothetical protein                               | QPI_00063               | RPI_00070 |
| PI_00065 | hypothetical protein                               |                         |           |
| PI_00067 | hypothetical protein                               | QPI_00070               | RPI_00077 |
| PI_00070 | hypothetical protein                               | QPI_00073               | RPI_00080 |
| PI_00071 | TH3996 VopL ( <i>vopL</i> <sup>4</sup> )           | QPI_00074               | RPI_00081 |
| PI_00073 | putative TraA                                      | QPI_00076               | RPI_00083 |
| PI_00074 | effector protein VopC ( <i>vopC</i> <sup>4</sup> ) | QPI_00077               | RPI_00084 |
| PI_00075 | hypothetical protein                               | QPI_00078               | RPI_00085 |
| PI_00076 | hypothetical protein                               |                         |           |
| PI_00077 | hypothetical protein                               |                         |           |
| PI_00079 | hypothetical protein                               | QPI_00082               |           |
| PI_00080 | Metallo-beta-lactamase superfamily protein         |                         |           |
| PI_00081 | hypothetical protein                               |                         |           |
| PI_00082 | hypothetical protein                               | QPI_00085               |           |
| PI_00083 | hypothetical protein                               |                         |           |
| PI_00084 | putative integrate membrane protein                | <i>kcsA</i> : QPI_00092 |           |

<sup>4</sup>Denotes annotated [see (3)] effector genes that were highly divergent from their presumed homolog in VP*α*

### C: Genes unique to VP*γ* absent or divergent in both VP*α* and VP*β*

| MAVP-Q VP <i>γ</i> | Annotation                                        |
|--------------------|---------------------------------------------------|
| QPI_00001          | putative hydrolase                                |
| QPI_00002          | hypothetical protein                              |
| QPI_00004          | <i>hlyD_2</i> :Hemolysin secretion protein D      |
| QPI_00006          | hypothetical protein                              |
| QPI_00011          | hypothetical protein                              |
| QPI_00014          | hypothetical protein                              |
| QPI_00015          | hypothetical protein                              |
| QPI_00028          | hypothetical protein                              |
| QPI_00038          | Insertion element 4 transposase                   |
| QPI_00083          | hypothetical protein                              |
| QPI_00084          | hypothetical protein                              |
| QPI_00085          | hypothetical protein                              |
| QPI_00087          | Integrase core domain protein                     |
| QPI_00090          | hypothetical protein                              |
| QPI_00091          | hypothetical protein                              |
| QPI_00093          | hypothetical protein                              |
| QPI_00094          | hypothetical protein                              |
| QPI_00102          | Integrase core domain protein                     |
| QPI_00103          | putative transposition protein                    |
| QPI_00104          | <i>msB</i> : Transposon Tn7 transposition protein |
| QPI_00105          | <i>msA</i> : endonuclease N terminal              |

Supplemental Table 2. Analysis of presence and co-occurrence of DNA encoding each of four hypothetical-proteins and *tdh*, as well as the contiguous five-gene module in representative draft genomes, by sequence type depicted in Supplemental Fig. 1<sup>a</sup>

| Sequence type | Percent coverage of VP <i>a</i> I gene or contiguous five-gene module |                                     |                                      |                                            |                         |                              | VP <i>a</i> I type |
|---------------|-----------------------------------------------------------------------|-------------------------------------|--------------------------------------|--------------------------------------------|-------------------------|------------------------------|--------------------|
|               | <i>hyp</i><br>AB831_22090<br>526 bp                                   | <i>hyp</i><br>AB831_22095<br>369 bp | <i>hyp</i><br>AB831_22100<br>1827 bp | <i>hyp</i><br>AB831_22105<br>108 of 177 bp | <i>tdh</i><br>570<br>bp | All five<br>genes<br>6118 bp |                    |
| 3             | 0                                                                     | 0                                   | 0                                    | 13.89                                      | 100                     | 24.21                        | $\alpha$           |
| 36            | 100                                                                   | 100                                 | 100                                  | 100                                        | 100                     | 100                          | $\gamma$           |
| 631           | 100                                                                   | 100                                 | 100                                  | 100                                        | 100                     | 100                          | $\gamma$           |
|               | 100                                                                   | 100                                 | 100                                  | 85.90                                      | 0                       | 80.94                        | $\beta$            |
|               | 0                                                                     | 0                                   | 0                                    | 0                                          | 0                       | 4.04                         | absent             |
| 43            | 100                                                                   | 100                                 | 100                                  | 100                                        | 100                     | 100                          | $\gamma$           |
| 636           | 100                                                                   | 100                                 | 100                                  | 100                                        | 100                     | 99.48                        | $\gamma$           |
| 1127          | 100                                                                   | 100                                 | 100                                  | 85.19                                      | 0                       | 80.94                        | $\beta$            |
| 110           | 100                                                                   | 100                                 | 100                                  | 100                                        | 100                     | 99.98                        | $\gamma$           |
| 34/324        | 100                                                                   | 100                                 | 100                                  | 100                                        | 100                     | 100                          | $\gamma$           |
| 674           | 100                                                                   | 100                                 | 100                                  | 100                                        | 100                     | 100                          | $\gamma$           |
|               | 0                                                                     | 0                                   | 0                                    | 0                                          | 0                       | 5.26                         | absent             |
| 308           | 100                                                                   | 100                                 | 100                                  | 100                                        | 100                     | 100                          | $\gamma$           |
| 23            | 100                                                                   | 100                                 | 100                                  | 100                                        | 100                     | 100                          | $\gamma$           |
| 749           | 100                                                                   | 100                                 | 100                                  | 100                                        | 100                     | 100                          | $\gamma$           |

<sup>a</sup>Analyses were performed on 300 quality draft genomes compared to the corresponding sequences in MAVP-Q as a reference, to determine the percent coverage of each gene (see methods). Data reported only for sequence types identified among regional clinical isolates as part of this study, where results from the comprehensive analyses are available upon request. ST308 isolate MAVP-67 was sequenced subsequent to this analysis, and presence of all five genes and the contiguous five-gene module was confirmed through manual analysis of its draft genome.

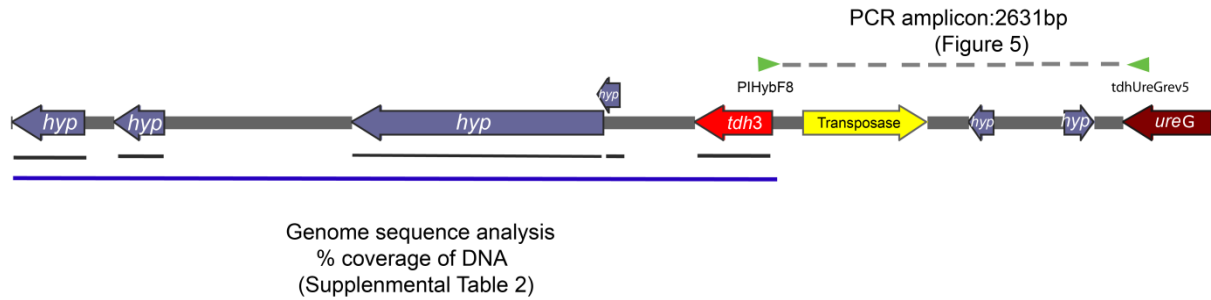

Supplemental Figure 1: Schematic depicting the complementary approaches for evaluating the potential conservation of *tdh* insertion location in various sequenced genomes and cultured isolates. The presence and percent coverage of each of four hypothetical protein encoding genes and *tdh* (black lines) or the entire five gene module (blue line) was determined from sequenced genomes (see methods). Specific primers (green) were subsequently designed and used to generate a PCR amplicon (grey dashed line) from *tdh* to the adjacent *ureG* gene, the results of which are presented in Fig. 5. Image generated with the aid of Snap Gene Viewer V3.3.4.

CLUSTAL W (1.8) multiple sequence alignment

```
MAVP-Q_AB831_04225 atgaatacgtgacagcaggctcgccagcgccagccttctcttggctcgaccaagacggc
G149_02408          atgaatacgtgacagcaggctcgccagcgccagccttctcttggctcgaccaagacggc

MAVP-Q_AB831_04225 aatactgttactcttgatgactttaaggcaagaaagtcctttctatttctacccaaaa
G149_02408          aatactgttactcttgatgactttaaggcaagaaagtcctttctatttctacccaaaa

MAVP-Q_AB831_04225 gccatgactccaggctgtaccacgcaagcaaagggcctgctgatgtaaagcagaacta
G149_02408          gccatgactccaggctgtaccacgcaagcaaagggcctgctgatgtaaagcagaacta

MAVP-Q_AB831_04225 gatgcgcaaacgtggtgttctgggtgtcagtatcgaccagttaagcgctaggaag
G149_02408          gatgcgcaaacgtggtgttctgggtgtcagtatcgaccagttaagcgctaggaag

MAVP-Q_AB831_04225 ttcattgaacgtgatgagctaaacttcacgctactgtctgacgaagatcacgctgttgc
G149_02408          ttcattgaacgtgatgagctaaacttcacgctactgtctgacgaagatcacgctgttgc

MAVP-Q_AB831_04225 gaacaattcgggtgtgtggggcgaaaagaaattatgggcaaagttacgatggccttcac
G149_02408          gaacaattcgggtgtgtggggcgaaaagaaattatgggcaaagttacgatggccttcac
                                MAVP-R island insertion site
                                ↓

MAVP-Q_AB831_04225 cgcatcagcttctaattaatgaagaaggcgtgattgagcacgtattcaacaagttcaaa
G149_02408          cgcatcagcttctaattaatgaagaaggcgtgattgagcacgtattcaacaagttcaaa

MAVP-Q_AB831_04225 acgaaagatcaccacgaagtggttctgaactacctaaacgaaaacgcctaa
G149_02408          acgaaagatcaccacgaagtggttctgaactacctaaacgaaaacgcctaa
```

Supplemental Figure 2. Locus matching the insertion site of VP $\alpha$ I- $\beta$  in MAVP-R, showing the absence of the island in MAVP-Q and G149.

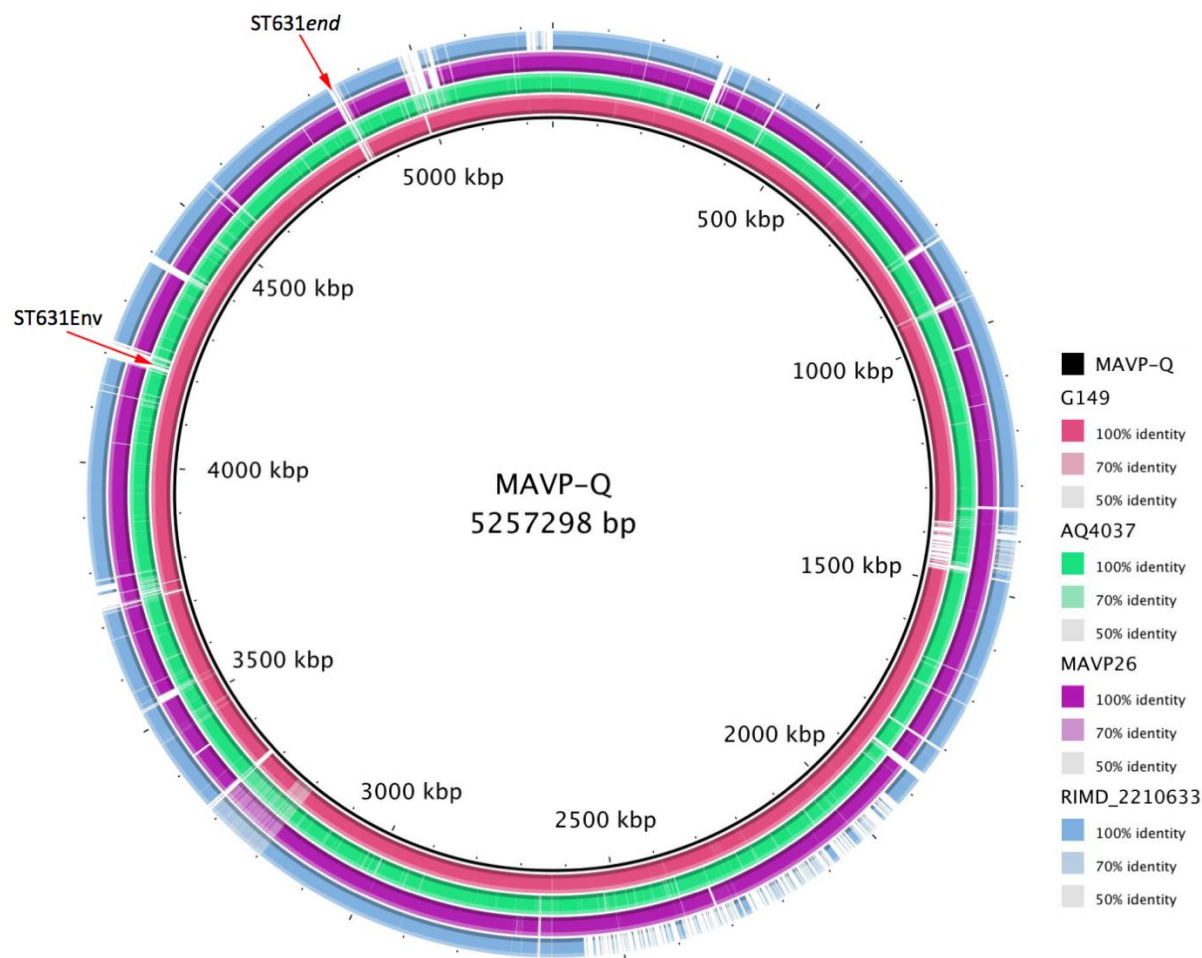

Supplemental Figure 3. Illustration of genetic markers unique to ST631 utilized for the development of a lineage-specific amplicon assay. The shared and unique genome contents of ST631 clade II (MAVP-Q, innermost circle) and clade I (G149 second from interior) isolates when compared to non-ST631 reference genomes (AQ4037 third from interior, MAVP-26 fourth from interior, and RIMD\_2210633 outermost circle) is depicted with unique genome content identified in ST631 (ST631env) and in clinically prevalent clade II ST631 (ST631end) using BRIG (1).



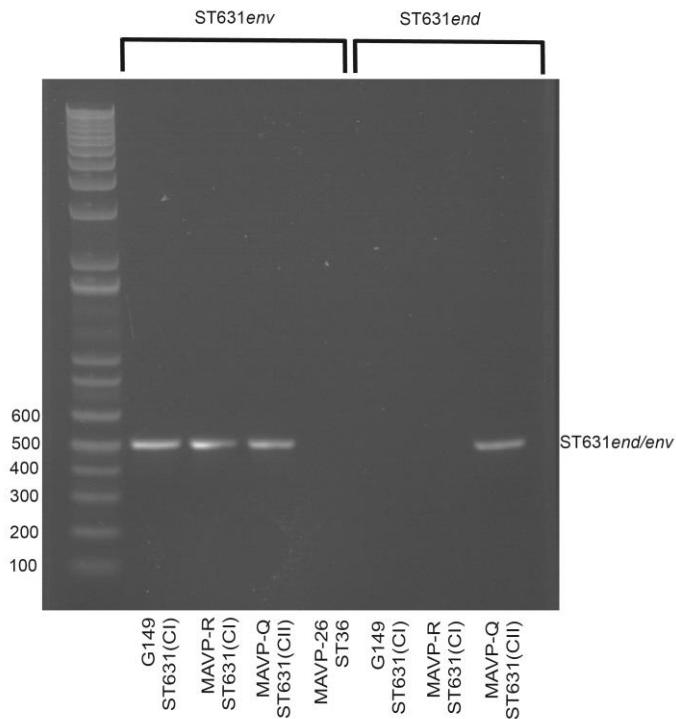

Supplemental Figure 4. PCR assays for the identification of ST631. The presence of *ST631env* and *ST631end* were determined by PCR amplification using gene-specific primers and visualized on a 1.2% agarose gel. The order from left to right is 1Kb+ ladder, clade I ST631 (G149, MAVP-R), clade II ST631 (MAVP-Q), ST36 (MAVP-26), clade I ST631 (G149, MAVP-R), and clade II ST631 (MAVP-Q). The corresponding sizes of the ladder fragments are as labeled to the left and the identity of the amplicons listed to the right of the gel image.

References:

1. Alikhan N-F, Petty NK, Zakour NLB, Beatson SA. 2011. BLAST Ring Image Generator (BRIG): simple prokaryote genome comparisons. *BMC Genomics* **12**:402

**2. Hubbard TP, Chao, MC, Abel, S, Blondel, CJ, zur Wiesch, PA, Zhou X, Davis, BM, Waldor M.K.** 2016. Genetic analysis of *Vibrio parahaemolyticus* intestinal colonization. Proc Natl Acad Sci USA. **113**:6283-6288.

**3. Okada N, Iida T, Park K-S, Goto N, Yasunaga T, Hiyoshi H, Matsuda S, Kodama T, Honda T.** 2009. Identification and characterization of a novel type III secretion system in trh-positive *Vibrio parahaemolyticus* strain TH3996 reveal genetic lineage and diversity of pathogenic machinery beyond the species level. Infect Immun **77**:904-913.

**4. Letchumanan V, Chan K-G, Lee L-H.** 2014. *Vibrio parahaemolyticus*: a review on pathogenesis, prevalence and advance molecular identification techniques. Front Microbiol **5**:705
